# Supplementary material for: Maximum Entropy Reconstructions of Dynamic Signaling Networks from Quantitative Proteomics Data
Source: PLoS One. 2009 Aug 26;4(8):e6522. doi: 10.1371/journal.pone.0006522 (PMC2728537; doi:10.1371/journal.pone.0006522)
Supplement: Figure S2 — (0.51 MB DOC) [file pone.0006522.s002.doc]

Figure S2. **Scatter plot of calculated vs**

Each matrix element is plotted against . A complicated relation is observed that suggests that and  have different meanings
