# Supplementary material for: Maximum Entropy Reconstructions of Dynamic Signaling Networks from Quantitative Proteomics Data
Source: PLoS One. 2009 Aug 26;4(8):e6522. doi: 10.1371/journal.pone.0006522 (PMC2728537; doi:10.1371/journal.pone.0006522)
Supplement: Figure S3 — (0.08 MB DOC) [file pone.0006522.s003.doc]

Figure S3. **Self interactions and network hubs**

a.) values of self interactions. Value of for each of the N=222 is plotted against phosphorylation (pY) site number. b.) values of inverse variance are shown for each pY site. Large values indicate large contributions to the overall network. Nodes with large() were ignored since their variations are small and too close to the error bars in the experiment.
